# Supplementary material
Source: PubMed Central journal article supplement (PMC4261050)
Supplement: NIHMS592146-supplement-2.pdf [file NIHMS592146-supplement-2.pdf]

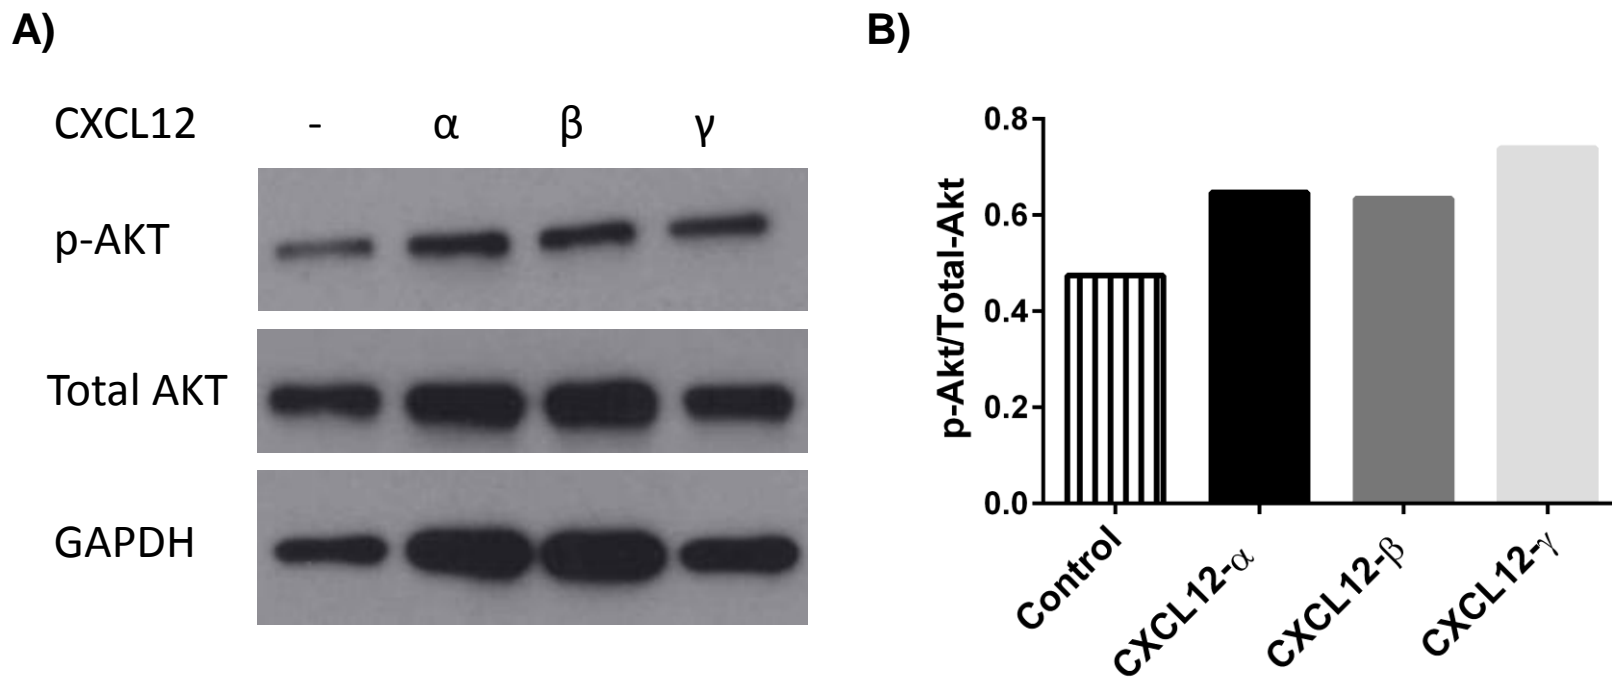

**Figure S1. Activation of AKT by CXCL12 isoforms in 293T cells.** (A) 293T cells were treated with CXCL12- $\alpha$ ,  $\beta$ ,  $\gamma$  or vehicle as for cells in Figure 1C. Western blot shows phosphorylated AKT (p-AKT) as a marker of pathway activation. Blot was sequentially stripped and re-probed for total AKT and GAPDH. (B) Graph of relative band intensities quantified by ImageJ.

A)

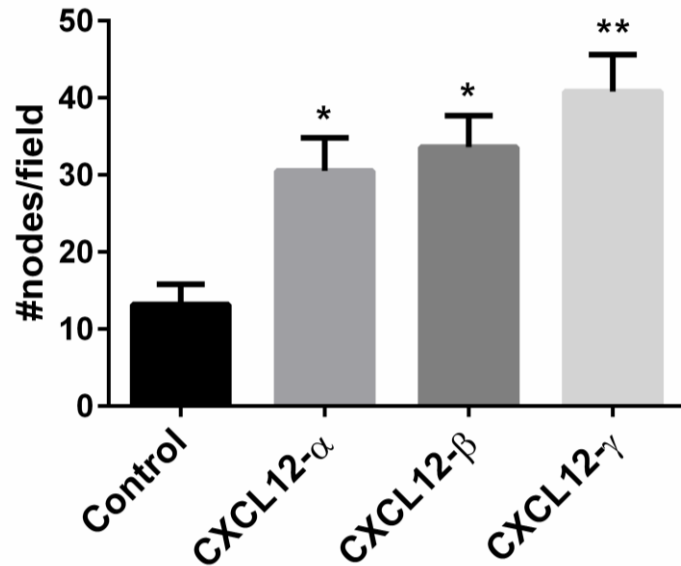

B)

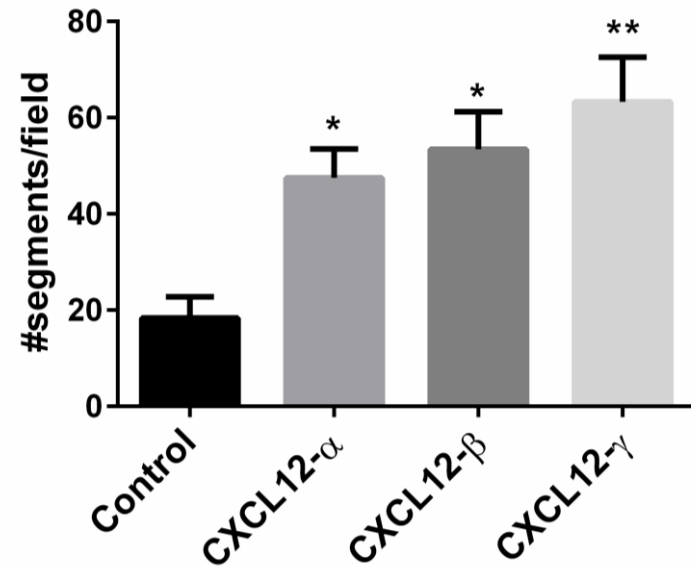

**Figure S2. Endothelial tubes formation with recombinant CXCL12 isoforms.** We treated HUVECs with 100 ng/ml recombinant CXCL12- $\alpha$ , $\beta$ , or  $\gamma$  or vehicle control and quantified endothelial tube formation by numbers of endothelial nodes (A) and segments (B). Graphs depict mean values + SEM. \*,  $p < 0.05$ ; \*\*,  $p < 0.01$ .

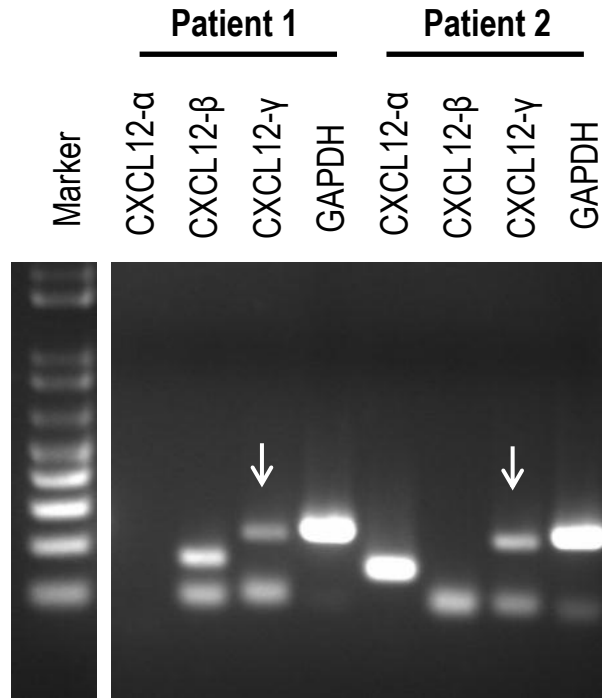

**Figure S3. RT-PCR of malignant pleural effusions.** Representative gel of RT-PCR products from RNA isolated from total cells recovered from malignant pleural effusions in two patients with metastatic breast cancer. Arrow denotes specific band from CXCL12- $\gamma$  primers. Markers show 100 base pair ladder.

**A)**

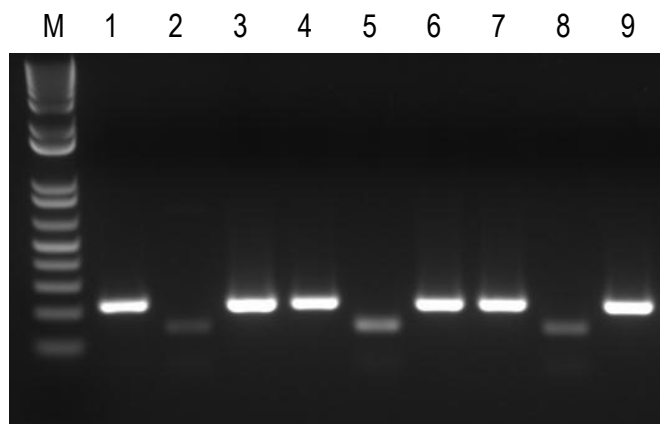

| RT-PCR from cultured bone marrow cells with CXCL12 primers common for mouse and human |                  |
|---------------------------------------------------------------------------------------|------------------|
| Sample number                                                                         | Primers          |
| 100 BP marker                                                                         |                  |
| 1                                                                                     | CXCL12- $\alpha$ |
| 2                                                                                     | Mouse GAPDH      |
| 3                                                                                     | Human GAPDH      |
| 4                                                                                     | CXCL12- $\beta$  |
| 5                                                                                     | Mouse GAPDH      |
| 6                                                                                     | Human GAPDH      |
| 7                                                                                     | CXCL12- $\gamma$ |
| 8                                                                                     | Mouse GAPDH      |
| 9                                                                                     | Human GAPDH      |

**B)**

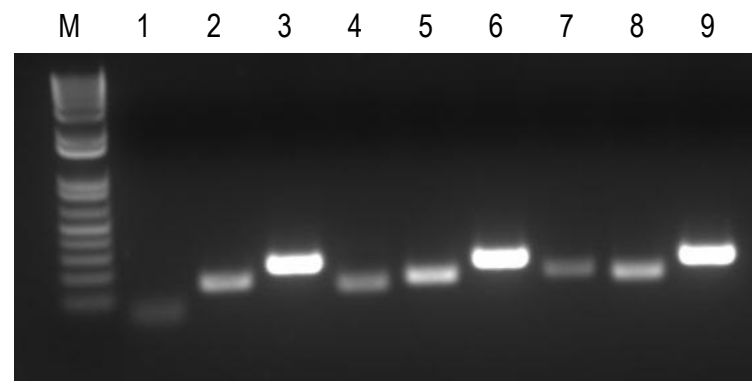

| RT-PCR from cultured bone marrow cells with GL primers |                  |
|--------------------------------------------------------|------------------|
| Sample number                                          | Primers          |
| 100 BP marker                                          |                  |
| 1                                                      | CXCL12- $\alpha$ |
| 2                                                      | Mouse GAPDH      |
| 3                                                      | Human GAPDH      |
| 4                                                      | CXCL12- $\beta$  |
| 5                                                      | Mouse GAPDH      |
| 6                                                      | Human GAPDH      |
| 7                                                      | CXCL12- $\gamma$ |
| 8                                                      | Mouse GAPDH      |
| 9                                                      | Human GAPDH      |

**Figure S4. RT-PCR of bone marrow samples from mice with metastases.** Representative gels of RT-PCR products from RNA isolated from total bone marrow cells. Panel A shows samples with CXCL12 primers common for mouse and human CXCL12, while panel B shows results from primers including the GLuc fusion.
